# Supplementary material for: Carboxymethyl cellulose-stabilized calcium phosphate particles for injectable hydrogel-based bone tissue engineering
Source: Royal Society of Chemistry journal article supplement (doi:10.1039/d4sm00670d), 2024-01-01
Supplement: d4sm00670d1.pdf [file d4sm00670d1.pdf]

## Supplementary Information

# Carboxymethyl cellulose-stabilized calcium phosphate particles for injectable hydrogel-based bone tissue engineering

*Piyaporn Srisura<sup>a#</sup>, Yuwaporn Pinyakit<sup>a#</sup>, Umphan Ngoensawat<sup>a</sup>, Pongsakorn Yuntasiri<sup>a</sup>, Khoiria Nur Atika Putri<sup>b</sup>, Theerapat Chanamuangkon<sup>c</sup>, Waranyoo Phoolcharoen<sup>d</sup>, Varol Intasanta<sup>e</sup>, and Voravee P. Hoven<sup>a,f,g\*</sup>*

<sup>a</sup>Department of Chemistry, Faculty of Science, Chulalongkorn University, Phayathai Road, Pathumwan, Bangkok, Thailand, 10330

<sup>b</sup>Program in Petrochemistry and Polymer Science, Faculty of Science, Chulalongkorn University, Phayathai Road, Pathumwan, Bangkok, 10330, Thailand.

<sup>c</sup>Biomaterial Testing Center Faculty of Dentistry, Chulalongkorn University, Phayathai Road, Pathumwan, Bangkok, Thailand, 10330

<sup>d</sup>Department of Pharmacognosy and Pharmaceutical Botany, Faculty of Pharmaceutical Sciences, Chulalongkorn University, Phayathai Road, Pathumwan, Bangkok 10330, Thailand; Research Unit for Plant-Produced Pharmaceuticals, Chulalongkorn University, Phayathai Road, Pathumwan, Bangkok 10330, Thailand.

<sup>e</sup>Nanohybrids and Coating Research Group, National Nanotechnology Center, National Science and Technology Development Agency, Pathum Thani, 12120, Thailand

<sup>f</sup>Center of Excellence in Materials and Biointerfaces, Chulalongkorn University, Phayathai Road, Pathumwan, Bangkok, Thailand, 10330

<sup>g</sup>Center of Excellence on Petrochemical and Materials Technology, Chulalongkorn University, Phayathai Road, Pathumwan, Bangkok 10330, Thailand

<sup>#</sup>Piyaporn Srisura and Yuwaporn Pinyakit contributed equally to this work.

\*Corresponding author Email: [vipavee.p@chula.ac.th](mailto:vipavee.p@chula.ac.th) (Voravee P. Hoven)

| Page |                                                                                                                                                 |
|------|-------------------------------------------------------------------------------------------------------------------------------------------------|
| 3    | Preparation of CMC-stabilized calcium phosphate particles via two-step wet chemical process                                                     |
| 4    | <b>Fig. S1</b> XRD patterns of CaP/CMC prepared by the two-step wet chemical process at different maturing time.                                |
| 5    | <b>Fig. S2</b> EDS spectra on randomly selected area of CaP (top) and CaP/CMC (bottom) particles and their corresponding elemental composition. |

## **Preparation of CMC-stabilized calcium phosphate particles via two-step wet chemical process**

To prepare the CaP particles, 20 mL of calcium nitrate solution was measured into a 100 mL beaker and placed under an overhead stirrer set to 300 rpm. Subsequently, 20 mL of ammonium phosphate solution was added dropwise over a period of 5 min. Ammonia solution was then added until the pH reached 10, and the mixture was stirred at room temperature with varied maturation times, 5 min, 30 min, 1 h, 3 h, and 6 h. The CaPs were then separated from the solution by centrifugation at 5000 rpm and washed with Milli-Q water three times until the pH of the washing medium became neutral. The CaP particles were then resuspended in a 20 mL solution of Milli-Q water containing CMC. After stirring for 30 min, the excess solution was removed by centrifugation at 300 rpm, and the particles were collected and freeze-dried for XRD characterization.

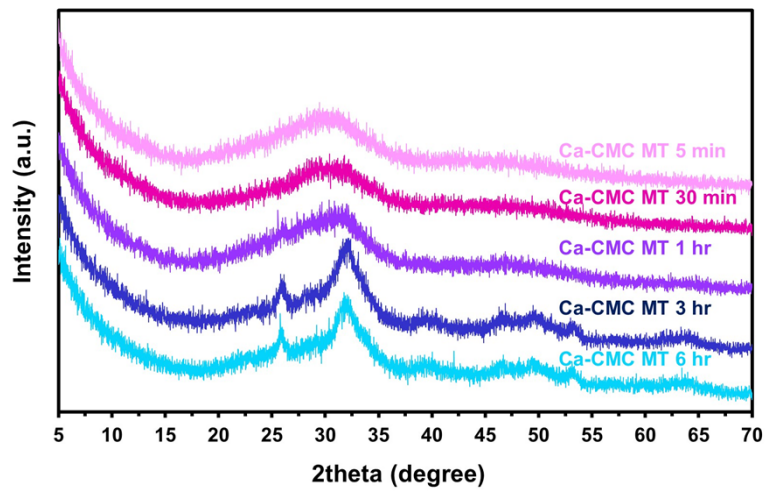

**Fig. S1.** XRD patterns of CaP/CMC prepared by the two-step wet chemical process at different maturing time.

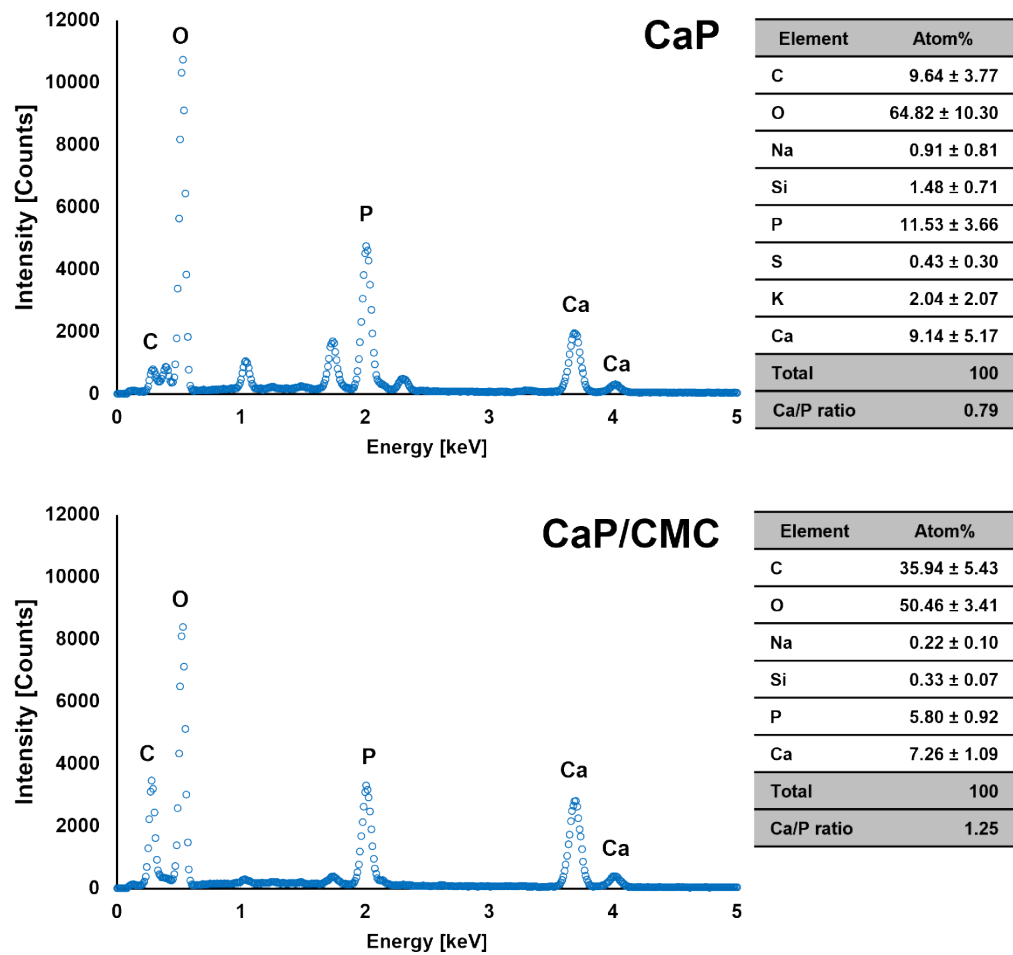

**Fig. S2** EDS spectra on randomly selected area of CaP (top) and CaP/CMC (bottom) particles and their corresponding elemental composition.
